# Supplementary material
Source: Springer Nature journal article supplement (https://www.springermedizin.de/resource/supplementary/13054_2012_1673_MOESM2_ESM.pdf/9711178)

A

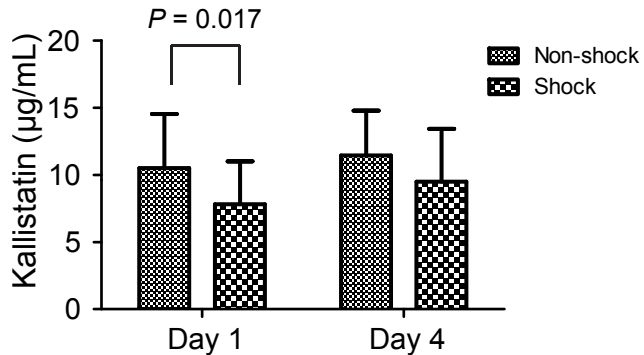

B

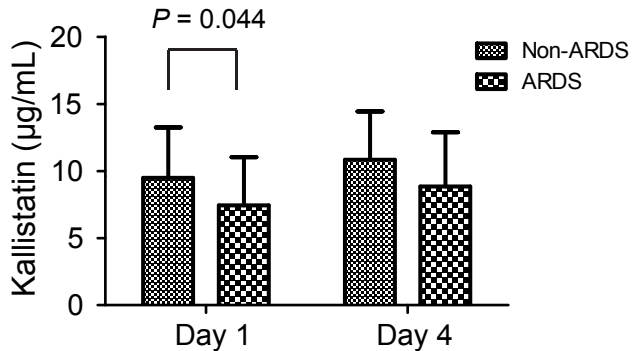

Supplement: MOESM2 [file 9711178]
